# Supplementary material for: Achieving broadband ultraviolet to mid-infrared transparency in germanate-based nonlinear optical crystals Cs3REGe3O9 (RE = Y, Gd)
Source: Royal Society of Chemistry journal article supplement (doi:10.1039/d3qi01807e), 2023-01-01
Supplement: d3qi01807e1.pdf [file d3qi01807e1.pdf]

## Electronic Supplementary Information (ESI)

### Achieving Broadband Ultraviolet to Mid-Infrared Transparency in Germanate-based Nonlinear Optical Crystals Cs<sub>3</sub>REGe<sub>3</sub>O<sub>9</sub> (RE = Y, Gd)

Jinmiao Jiao,<sup>a</sup> Conggang Li,<sup>\*a</sup> Yuheng She,<sup>a</sup> Ning Ye,<sup>a</sup> Zhanggui Hu,<sup>\*a</sup> and Yicheng Wu<sup>a</sup>

<sup>a</sup>Tianjin Key Laboratory of Functional Crystal Materials, Institute of Functional Crystal, Tianjin University of Technology, Tianjin 300384, China.

\*Corresponding author, E-mail address: cgli@email.tjut.edu.cn

1. **Fig. S1** Powder XRD patterns of the Cs<sub>3</sub>YGe<sub>3</sub>O<sub>9</sub> and Cs<sub>3</sub>GdGe<sub>3</sub>O<sub>9</sub> polycrystalline powder before and after melting at 1250 °C, respectively.
2. **Fig. S2** EDS of Cs<sub>3</sub>YGe<sub>3</sub>O<sub>9</sub> (a) atomic ratio of various elements, (b) surface morphology, (c-f) Cs, Ge, Y, and O mapping results, respectively.
3. **Fig. S3** EDS of Cs<sub>3</sub>GdGe<sub>3</sub>O<sub>9</sub> (a) atomic ratio of various elements, (b) surface morphology, (c-f) Cs, Ge, Gd, and O mapping results, respectively.
4. **Table S1** Selected bond lengths (Å) and angles (deg.) for Cs<sub>3</sub>YGe<sub>3</sub>O<sub>9</sub>.
5. **Table S2** Selected bond lengths (Å) and angles (deg.) for and Cs<sub>3</sub>GdGe<sub>3</sub>O<sub>9</sub>.
6. **Table S3** The final atomic coordinates ( $\times 10^4$ ) and equivalent isotropic displacement parameters ( $\text{Å}^2 \times 10^3$ ) for Cs<sub>3</sub>YGe<sub>3</sub>O<sub>9</sub>.  $U_{\text{eq}}$  is defined as one-third of the trace of the orthogonalized  $U_{ij}$  tensor, and the bond valence sum for each atom in asymmetric unit.
7. **Table S4** The final atomic coordinates ( $\times 10^4$ ) and equivalent isotropic displacement parameters ( $\text{Å}^2 \times 10^3$ ) for Cs<sub>3</sub>GdGe<sub>3</sub>O<sub>9</sub>.  $U_{\text{eq}}$  is defined as one-third of the trace of the orthogonalized  $U_{ij}$  tensor, and the bond valence sum for each atom in asymmetric unit.
8. **Table S5** The detailed infrared peaks of CYGO and CGGO, respectively.

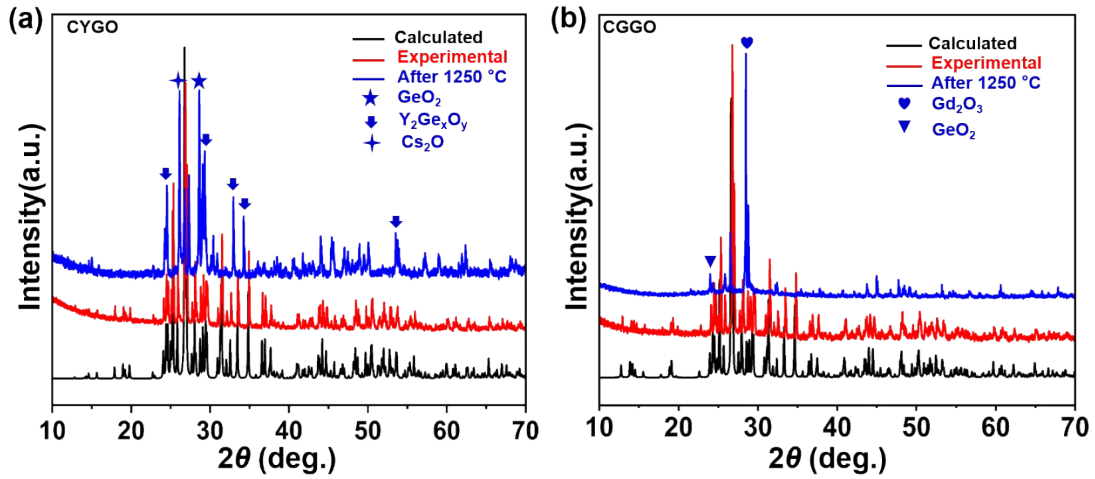

**Fig. S1(a-b)** Comparison of theoretical XRD spectra, experimentally obtained polycrystalline pure phase XRD spectra, and XRD spectra after calcination at 1250 °C for CYGO and CGGO, respectively.

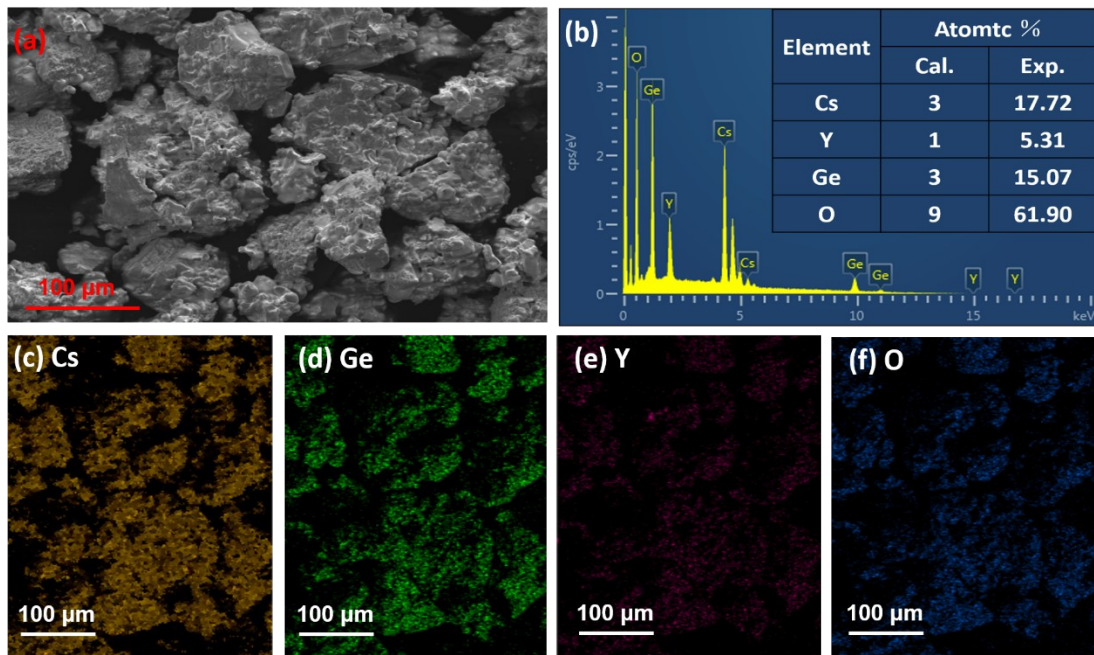

**Fig. S2** EDS of  $\text{Cs}_3\text{YGe}_3\text{O}_9$ . (a) Atomic ratio of various elements, (b) Surface morphology, (c-f) Cs, Ge, Y, and O mapping results, respectively.

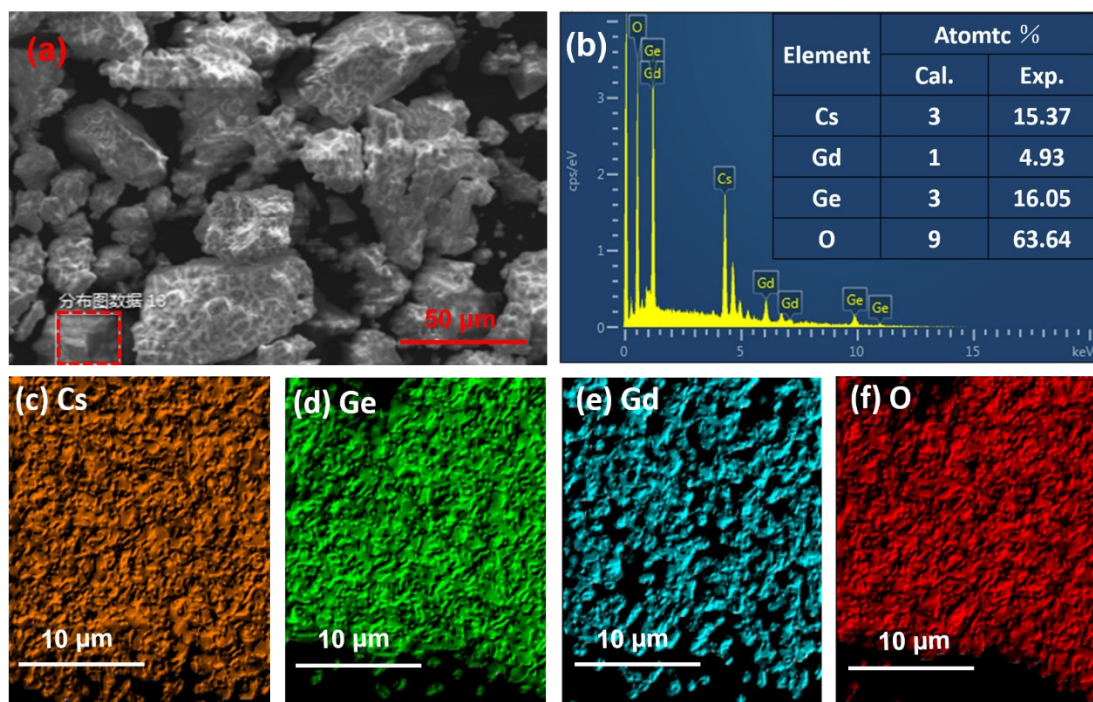

**Fig. S3** EDS of  $\text{Cs}_3\text{GdGe}_3\text{O}_9$ . (a) Atomic ratio of various elements, (b) Surface morphology, (c-f) Cs, Ge, Gd, and O mapping results, respectively.

**Table S1** Selected bond lengths (Å) and angles (deg.) for Cs<sub>3</sub>YGe<sub>3</sub>O<sub>9</sub>.

|                     |            |                     |            |
|---------------------|------------|---------------------|------------|
| Cs(1)-O(1)          | 2.993(6)   | O(1)-Cs(3A)#9       | 3.004(19)  |
| Cs(1)-O(5)#1        | 3.079(7)   | O(4)-Cs(3A)#6       | 3.037(15)  |
| Cs(1)-O(8)#2        | 3.098(7)   | O(9)-Cs(3A)#9       | 3.064(16)  |
| Cs(1)-O(4)#3        | 3.194(7)   | O(3)-Cs(3A)#6       | 3.201(17)  |
| Cs(1)-O(2)          | 3.381(7)   | O(3)-Cs(3A)#9       | 3.53(3)    |
| Cs(1)-O(9)#2        | 3.397(6)   | O(7)-Cs(3A)         | 3.78(3)    |
| Cs(2)-O(3)          | 3.041(6)   | O(2)-Cs(3A)         | 2.855(17)  |
| Cs(2)-O(8)#5        | 3.134(7)   | Y(1)-O(8)#8         | 2.241(6)   |
| Cs(2)-O(6)#2        | 3.146(7)   | Y(1)-O(2)#3         | 2.244(7)   |
| Cs(2)-O(5)#5        | 3.156(7)   | Y(1)-O(3)#1         | 2.250(6)   |
| Cs(2)-O(9)#2        | 3.230(7)   | Y(1)-O(4)#3         | 2.259(6)   |
| Cs(2)-O(7)#2        | 3.262(7)   | Y(1)-O(1)           | 2.270(6)   |
| Cs(3)-O(2)          | 2.925(9)   | Y(1)-O(5)#1         | 2.281(6)   |
| Cs(3)-O(4)#3        | 3.026(8)   | Ge(1)-O(1)          | 1.721(6)   |
| Cs(3)-O(1)#7        | 3.099(8)   | Ge(1)-O(2)          | 1.722(7)   |
| Cs(3)-O(9)#7        | 3.114(9)   | Ge(1)-O(7)          | 1.786(6)   |
| Cs(3)-O(3)#3        | 3.152(9)   | Ge(1)-O(9)          | 1.789(6)   |
| Cs(3)-O(7)          | 3.618(9)   | Ge(3)-O(3)          | 1.712(6)   |
| Cs(3)-O(3)#7        | 3.721(10)  | Ge(3)-O(4)          | 1.723(6)   |
| Ge(2)-O(8)          | 1.730(6)   | Ge(3)-O(6)          | 1.763(6)   |
| Ge(2)-O(5)          | 1.732(6)   | Ge(3)-O(9)          | 1.774(6)   |
| Ge(2)-O(7)#10       | 1.769(6)   |                     |            |
| Ge(2)-O(6)          | 1.779(6)   |                     |            |
| O(1)-Cs(1)-O(5)#1   | 61.80(15)  | O(2)-Cs(3)-O(3)#7   | 56.22(19)  |
| O(1)-Cs(1)-O(8)#2   | 103.52(15) | O(4)#3-Cs(3)-O(3)#7 | 127.1(2)   |
| O(5)#1-Cs(1)-O(8)#2 | 157.69(18) | O(1)#7-Cs(3)-O(3)#7 | 81.4(2)    |
| O(1)-Cs(1)-O(4)#3   | 60.96(16)  | O(9)#7-Cs(3)-O(3)#7 | 47.97(17)  |
| O(5)#1-Cs(1)-O(4)#3 | 60.90(17)  | O(3)#3-Cs(3)-O(3)#7 | 138.58(17) |

|                     |            |                    |           |
|---------------------|------------|--------------------|-----------|
| O(8)#2-Cs(1)-O(4)#3 | 129.15(17) | O(7)-Cs(3)-O(3)#7  | 99.51(18) |
| O(1)-Cs(1)-O(2)     | 53.96(15)  | O(8)#8-Y(1)-O(2)#3 | 88.3(3)   |
| O(5)#1-Cs(1)-O(2)   | 114.64(15) | O(8)#8-Y(1)-O(3)#1 | 86.7(2)   |
| O(8)#2-Cs(1)-O(2)   | 57.48(15)  | O(2)#3-Y(1)-O(3)#1 | 91.1(3)   |
| O(4)#3-Cs(1)-O(2)   | 78.30(16)  | O(8)#8-Y(1)-O(4)#3 | 97.6(2)   |
| O(1)-Cs(1)-O(9)#2   | 114.69(16) | O(2)#3-Y(1)-O(4)#3 | 87.0(2)   |
| O(5)#1-Cs(1)-O(9)#2 | 83.15(15)  | O(3)#1-Y(1)-O(4)#3 | 175.3(2)  |
| O(8)#2-Cs(1)-O(9)#2 | 89.02(15)  | O(8)#8-Y(1)-O(1)   | 86.6(2)   |
| O(4)#3-Cs(1)-O(9)#2 | 141.80(16) | O(2)#3-Y(1)-O(1)   | 172.2(2)  |
| O(2)-Cs(1)-O(9)#2   | 132.69(16) | O(3)#1-Y(1)-O(1)   | 94.4(2)   |
| O(3)-Cs(2)-O(8)#5   | 59.87(16)  | O(4)#3-Y(1)-O(1)   | 87.9(2)   |
| O(3)-Cs(2)-O(6)#2   | 115.89(17) | O(8)#8-Y(1)-O(5)#1 | 170.3(3)  |
| O(8)#5-Cs(2)-O(6)#2 | 131.97(19) | O(2)#3-Y(1)-O(5)#1 | 99.2(3)   |
| O(3)-Cs(2)-O(5)#5   | 103.39(16) | O(3)#1-Y(1)-O(5)#1 | 87.1(2)   |
| O(8)#5-Cs(2)-O(5)#5 | 54.51(15)  | O(4)#3-Y(1)-O(5)#1 | 88.9(2)   |
| O(6)#2-Cs(2)-O(5)#5 | 85.26(19)  | O(1)-Y(1)-O(5)#1   | 86.5(2)   |
| O(3)-Cs(2)-O(9)#2   | 159.22(16) | O(1)-Ge(1)-O(2)    | 115.5(3)  |
| O(8)#5-Cs(2)-O(9)#2 | 140.23(16) | O(1)-Ge(1)-O(7)    | 112.7(3)  |
| O(6)#2-Cs(2)-O(9)#2 | 49.80(16)  | O(2)-Ge(1)-O(7)    | 107.7(3)  |
| O(5)#5-Cs(2)-O(9)#2 | 91.14(15)  | O(1)-Ge(1)-O(9)    | 108.7(3)  |
| O(3)-Cs(2)-O(7)#2   | 137.93(17) | O(2)-Ge(1)-O(9)    | 111.5(3)  |
| O(8)#5-Cs(2)-O(7)#2 | 112.52(19) | O(7)-Ge(1)-O(9)    | 99.7(3)   |
| O(6)#2-Cs(2)-O(7)#2 | 99.29(17)  | O(8)-Ge(2)-O(5)    | 112.6(3)  |
| O(5)#5-Cs(2)-O(7)#2 | 101.70(17) | O(8)-Ge(2)-O(7)#10 | 112.4(3)  |
| O(9)#2-Cs(2)-O(7)#2 | 49.76(16)  | O(5)-Ge(2)-O(7)#10 | 111.3(3)  |
| O(2)-Cs(3)-O(4)#3   | 88.5(2)    | O(8)-Ge(2)-O(6)    | 108.4(3)  |
| O(2)-Cs(3)-O(1)#7   | 135.9(3)   | O(5)-Ge(2)-O(6)    | 113.5(3)  |
| O(4)#3-Cs(3)-O(1)#7 | 111.3(2)   | O(7)#10-Ge(2)-O(6) | 97.7(3)   |
| O(2)-Cs(3)-O(9)#7   | 97.1(2)    | O(3)-Ge(3)-O(4)    | 113.3(3)  |

|                     |           |                   |            |
|---------------------|-----------|-------------------|------------|
| O(4)#3-Cs(3)-O(9)#7 | 163.6(2)  | O(3)-Ge(3)-O(6)   | 114.3(3)   |
| O(1)#7-Cs(3)-O(9)#7 | 54.66(18) | O(4)-Ge(3)-O(6)   | 107.1(3)   |
| O(2)-Cs(3)-O(3)#3   | 143.1(2)  | O(3)-Ge(3)-O(9)   | 108.7(3)   |
| O(4)#3-Cs(3)-O(3)#3 | 55.30(18) | O(4)-Ge(3)-O(9)   | 114.0(3)   |
| O(1)#7-Cs(3)-O(3)#3 | 64.11(18) | O(6)-Ge(3)-O(9)   | 98.8(3)    |
| O(9)#7-Cs(3)-O(3)#3 | 115.9(2)  | O(1)#7-Cs(3)-O(7) | 166.7(2)   |
| O(2)-Cs(3)-O(7)     | 49.94(18) | O(9)#7-Cs(3)-O(7) | 116.50(19) |
| O(4)#3-Cs(3)-O(7)   | 78.9(2)   | O(3)#3-Cs(3)-O(7) | 119.4(2)   |

Symmetry transformations used to generate equivalent atoms:

|                        |                       |                        |
|------------------------|-----------------------|------------------------|
| #1 -x+1,-y,z-1/2       | #2 x+1/2,-y+1/2,z     | #3 -x+1,-y+1,z-1/2     |
| #4 x+1/2,-y+3/2,z      | #5 x+1/2,-y-1/2,z     | #6 -x+1,-y+1,z+1/2     |
| #7 x,y+1,z             | #8 -x+1/2,y+1/2,z-1/2 | #9 x,y-1,z             |
| #10 -x+1/2,y-1/2,z+1/2 | #11 x-1/2,-y+3/2,z    | #12 -x+3/2,y+1/2,z-1/2 |
| #13 x-1/2,-y+1/2,z     | #14 x-1/2,-y-1/2,z    | #15 -x+1,-y,z+1/2      |

**Table S2** Selected bond lengths (Å) and angles (deg.) for Cs<sub>3</sub>GdGe<sub>3</sub>O<sub>9</sub>.

|               |         |                |           |
|---------------|---------|----------------|-----------|
| Cs(1)-O(4)    | 2.91(2) | Cs(2A)-O(9)#10 | 2.69(3)   |
| Cs(1)-O(2)#7  | 3.08(2) | Cs(2A)-O(6)#3  | 2.97(3)   |
| Cs(1)-O(9)#8  | 3.13(2) | Cs(2A)-O(3)    | 2.97(3)   |
| Cs(1)-O(3)#8  | 3.17(2) | Cs(2A)-O(8)    | 3.25(3)   |
| Cs(1)-O(1)#7  | 3.23(2) | Cs(2A)-O(7)#3  | 3.27(4)   |
| Cs(1)-O(5)    | 3.61(2) | Cs(2A)-O(4)#10 | 3.42(3)   |
| Cs(1)-O(1)#8  | 3.69(2) | Cs(2A)-O(5)    | 3.49(3)   |
| Cs(1A)-O(4)   | 2.86(3) | Gd(1)-O(4)#1   | 2.28(2)   |
| Cs(1A)-O(9)#8 | 2.94(3) | Gd(1)-O(2)#1   | 2.286(19) |
| Cs(1A)-O(2)#7 | 3.03(3) | Gd(1)-O(1)     | 2.29(2)   |
| Cs(1A)-O(3)#8 | 3.24(3) | Gd(1)-O(9)#2   | 2.31(2)   |
| Cs(1A)-O(1)#7 | 3.30(3) | Gd(1)-O(8)#3   | 2.331(19) |
| Cs(1A)-O(1)#8 | 3.34(4) | Gd(1)-O(6)#2   | 2.33(2)   |
| Cs(2)-O(9)#10 | 3.00(2) | Ge(1)-O(1)     | 1.71(2)   |
| Cs(2)-O(6)#3  | 3.07(2) | Ge(1)-O(2)     | 1.73(2)   |

|                     |           |                     |           |
|---------------------|-----------|---------------------|-----------|
| Cs(2)-O(8)          | 3.07(2)   | Ge(1)-O(7)#3        | 1.75(2)   |
| Cs(2)-O(2)#11       | 3.23(2)   | Ge(1)-O(3)          | 1.78(2)   |
| Cs(2)-O(4)#10       | 3.42(2)   | Ge(2)-O(4)          | 1.73(2)   |
| Cs(2)-O(3)          | 3.44(2)   | Ge(2)-O(5)          | 1.75(2)   |
| Cs(3)-O(1)#10       | 3.070(18) | Ge(2)-O(9)          | 1.76(2)   |
| Cs(3)-O(8)#12       | 3.16(2)   | Ge(2)-O(3)          | 1.769(19) |
| Cs(3)-O(6)#12       | 3.17(2)   | Ge(3)-O(6)          | 1.71(2)   |
| Cs(3)-O(7)#3        | 3.18(2)   | Ge(3)-O(8)          | 1.746(19) |
| Cs(3)-O(3)          | 3.22(2)   | Ge(3)-O(7)          | 1.80(2)   |
| Cs(3)-O(5)          | 3.31(3)   | Ge(3)-O(5)          | 1.82(2)   |
| Cs(3A)-O(1)#10      | 2.70(3)   | Cs(3A)-O(6)#12      | 3.03(4)   |
| Cs(3A)-O(8)#12      | 2.92(4)   | Cs(3A)-O(2)#10      | 3.75(4)   |
| Cs(3A)-O(7)#3       | 2.98(4)   | Cs(3A)-O(1)#10      | 2.70(3)   |
| O(4)#1-Gd(1)-O(2)#1 | 86.9(8)   | O(4)-Cs(1)-O(2)#7   | 89.0(6)   |
| O(4)#1-Gd(1)-O(1)   | 90.8(8)   | O(4)-Cs(1)-O(9)#8   | 137.3(6)  |
| O(2)#1-Gd(1)-O(1)   | 174.4(7)  | O(2)#7-Cs(1)-O(9)#8 | 110.1(6)  |
| O(4)#1-Gd(1)-O(9)#2 | 173.2(8)  | O(4)-Cs(1)-O(3)#8   | 98.9(6)   |
| O(2)#1-Gd(1)-O(9)#2 | 88.3(8)   | O(2)#7-Cs(1)-O(3)#8 | 163.1(6)  |
| O(1)-Gd(1)-O(9)#2   | 94.4(8)   | O(9)#8-Cs(1)-O(3)#8 | 54.5(5)   |
| O(4)#1-Gd(1)-O(8)#3 | 99.7(8)   | O(4)-Cs(1)-O(1)#7   | 142.8(6)  |
| O(2)#1-Gd(1)-O(8)#3 | 87.7(7)   | O(2)#7-Cs(1)-O(1)#7 | 54.2(5)   |
| O(1)-Gd(1)-O(8)#3   | 87.7(7)   | O(9)#8-Cs(1)-O(1)#7 | 64.0(5)   |
| O(9)#2-Gd(1)-O(8)#3 | 84.8(8)   | O(3)#8-Cs(1)-O(1)#7 | 115.2(5)  |
| O(4)#1-Gd(1)-O(6)#2 | 88.3(8)   | O(4)-Cs(1)-O(5)     | 49.0(5)   |
| O(2)#1-Gd(1)-O(6)#2 | 97.4(8)   | O(2)#7-Cs(1)-O(5)   | 79.2(5)   |
| O(1)-Gd(1)-O(6)#2   | 87.6(7)   | O(9)#8-Cs(1)-O(5)   | 167.0(6)  |
| O(9)#2-Gd(1)-O(6)#2 | 87.6(8)   | O(3)#8-Cs(1)-O(5)   | 117.2(5)  |
| O(8)#3-Gd(1)-O(6)#2 | 170.8(8)  | O(1)#7-Cs(1)-O(5)   | 118.7(6)  |
| O(4)-Cs(1)-O(1)#8   | 57.6(6)   | O(4)-Cs(1A)-O(9)#8  | 152.0(11) |

|                       |           |                       |           |
|-----------------------|-----------|-----------------------|-----------|
| O(2)#7-Cs(1)-O(1)#8   | 128.3(5)  | O(4)-Cs(1A)-O(2)#7    | 90.8(8)   |
| O(9)#8-Cs(1)-O(1)#8   | 81.6(5)   | O(9)#8-Cs(1A)-O(2)#7  | 117.1(9)  |
| O(3)#8-Cs(1)-O(1)#8   | 48.6(5)   | O(4)-Cs(1A)-O(3)#8    | 98.2(9)   |
| O(1)#7-Cs(1)-O(1)#8   | 139.0(3)  | O(9)#8-Cs(1A)-O(3)#8  | 55.4(6)   |
| O(5)-Cs(1)-O(1)#8     | 99.9(5)   | O(2)#7-Cs(1A)-O(3)#8  | 160.7(16) |
| O(9)#10-Cs(2)-O(6)#3  | 104.2(6)  | O(9)#8-Cs(1A)-O(1)#7  | 65.2(7)   |
| O(9)#10-Cs(2)-O(8)    | 62.1(5)   | O(2)#7-Cs(1A)-O(1)#7  | 53.9(6)   |
| O(6)#3-Cs(2)-O(8)     | 157.6(6)  | O(3)#8-Cs(1A)-O(1)#7  | 111.6(9)  |
| O(9)#10-Cs(2)-O(2)#11 | 61.7(6)   | O(4)-Cs(1A)-O(1)#8    | 62.7(8)   |
| O(6)#3-Cs(2)-O(2)#11  | 130.7(6)  | O(9)#8-Cs(1A)-O(1)#8  | 90.8(9)   |
| O(8)-Cs(2)-O(2)#11    | 61.0(5)   | O(2)#7-Cs(1A)-O(1)#8  | 146.5(11) |
| O(9)#10-Cs(2)-O(4)#10 | 53.9(5)   | O(3)#8-Cs(1A)-O(1)#8  | 51.5(6)   |
| O(6)#3-Cs(2)-O(4)#10  | 59.1(6)   | O(1)#7-Cs(1A)-O(1)#8  | 155.7(8)  |
| O(8)-Cs(2)-O(4)#10    | 114.7(5)  | O(4)-Cs(1A)-O(1)#7    | 141.6(12) |
| O(2)#11-Cs(2)-O(4)#10 | 78.3(6)   | O(1)#10-Cs(3)-O(8)#12 | 103.7(5)  |
| O(9)#10-Cs(2)-O(3)    | 113.2(6)  | O(1)#10-Cs(3)-O(6)#12 | 61.6(6)   |
| O(6)#3-Cs(2)-O(3)     | 88.1(5)   | O(8)#12-Cs(3)-O(6)#12 | 54.0(5)   |
| O(8)-Cs(2)-O(3)       | 82.3(5)   | O(1)#10-Cs(3)-O(7)#3  | 117.0(6)  |
| O(2)#11-Cs(2)-O(3)    | 141.2(5)  | O(8)#12-Cs(3)-O(7)#3  | 84.7(6)   |
| O(4)#10-Cs(2)-O(3)    | 132.5(5)  | O(6)#12-Cs(3)-O(7)#3  | 132.5(7)  |
| O(9)#10-Cs(2A)-O(6)#3 | 115.7(9)  | O(1)#10-Cs(3)-O(3)    | 159.9(5)  |
| O(9)#10-Cs(2A)-O(3)   | 144.7(11) | O(8)#12-Cs(3)-O(3)    | 91.2(5)   |
| O(6)#3-Cs(2A)-O(3)    | 99.6(9)   | O(6)#12-Cs(3)-O(3)    | 138.2(5)  |
| O(9)#10-Cs(2A)-O(8)   | 62.9(7)   | O(7)#3-Cs(3)-O(3)     | 50.2(6)   |
| O(6)#3-Cs(2A)-O(8)    | 151.0(12) | O(1)#10-Cs(3)-O(5)    | 137.2(6)  |
| O(3)-Cs(2A)-O(8)      | 87.3(8)   | O(8)#12-Cs(3)-O(5)    | 101.6(5)  |
| O(9)#10-Cs(2A)-O(7)#3 | 155.1(11) | O(6)#12-Cs(3)-O(5)    | 110.2(6)  |
| O(6)#3-Cs(2A)-O(7)#3  | 53.9(7)   | O(7)#3-Cs(3)-O(5)     | 99.2(6)   |
| O(3)-Cs(2A)-O(7)#3    | 51.3(7)   | O(3)-Cs(3)-O(5)       | 49.2(5)   |



|                        |           |                        |           |
|------------------------|-----------|------------------------|-----------|
| O(8)-Cs(2A)-O(7)#3     | 138.5(9)  | O(1)#10-Cs(3A)-O(8)#12 | 121.2(13) |
| O(9)#10-Cs(2A)-O(4)#10 | 55.9(7)   | O(1)#10-Cs(3A)-O(7)#3  | 139.2(15) |
| O(6)#3-Cs(2A)-O(4)#10  | 59.9(7)   | O(8)#12-Cs(3A)-O(7)#3  | 92.7(11)  |
| O(3)-Cs(2A)-O(4)#10    | 159.4(10) | O(1)#10-Cs(3A)-O(6)#12 | 67.5(8)   |
| O(8)-Cs(2A)-O(4)#10    | 110.2(9)  | O(8)#12-Cs(3A)-O(6)#12 | 57.7(9)   |
| O(7)#3-Cs(2A)-O(4)#10  | 110.1(9)  | O(7)#3-Cs(3A)-O(6)#12  | 150.4(14) |
| O(9)#10-Cs(2A)-O(5)    | 96.0(9)   | O(1)#10-Cs(3A)-O(3)    | 146.7(16) |
| O(6)#3-Cs(2A)-O(5)     | 147.2(10) | O(8)#12-Cs(3A)-O(3)    | 85.3(9)   |
| O(3)-Cs(2A)-O(5)       | 48.9(6)   | O(7)#3-Cs(3A)-O(3)     | 45.8(7)   |
| O(8)-Cs(2A)-O(5)       | 51.6(6)   | O(6)#12-Cs(3A)-O(3)    | 123.0(12) |
| O(7)#3-Cs(2A)-O(5)     | 93.8(8)   | O(1)#10-Cs(3A)-O(2)#10 | 49.8(7)   |
| O(4)#10-Cs(2A)-O(5)    | 151.4(9)  | O(8)#12-Cs(3A)-O(2)#10 | 146.1(15) |
| O(1)-Ge(1)-O(2)        | 113.7(11) | O(7)#3-Cs(3A)-O(2)#10  | 89.5(10)  |
| O(1)-Ge(1)-O(7)#3      | 114.1(10) | O(6)#12-Cs(3A)-O(2)#10 | 114.9(9)  |
| O(2)-Ge(1)-O(7)#3      | 105.2(12) | O(3)-Cs(3A)-O(2)#10    | 118.9(10) |
| O(1)-Ge(1)-O(3)        | 110.3(11) | O(6)-Ge(3)-O(8)        | 112.3(11) |
| O(2)-Ge(1)-O(3)        | 112.1(10) | O(6)-Ge(3)-O(7)        | 107.7(12) |
| O(7)#3-Ge(1)-O(3)      | 100.7(11) | O(8)-Ge(3)-O(7)        | 114.8(9)  |
| O(4)-Ge(2)-O(5)        | 105.8(11) | O(6)-Ge(3)-O(5)        | 113.1(11) |
| O(4)-Ge(2)-O(9)        | 114.2(10) | O(8)-Ge(3)-O(5)        | 111.2(11) |
| O(5)-Ge(2)-O(9)        | 114.7(11) | O(7)-Ge(3)-O(5)        | 96.7(11)  |
| O(4)-Ge(2)-O(3)        | 110.5(11) | O(5)-Ge(2)-O(3)        | 101.0(11) |
| O(9)-Ge(2)-O(3)        | 109.8(10) |                        |           |

---

Symmetry transformations used to generate equivalent atoms:

|                        |                            |                            |
|------------------------|----------------------------|----------------------------|
| #1 $x, y+1, z$         | #2 $-x+1, -y+2, z+1/2$     | #3 $-x+1/2, y+1/2, z+1/2$  |
| #4 $x+1/2, -y+3/2, z$  | #5 $-x+1, -y+1, z+1/2$     | #6 $-x+1/2, y-1/2, z-1/2$  |
| #7 $-x+1, -y+1, z-1/2$ | #8 $x, y-1, z$             | #9 $x+1/2, -y+1/2, z$      |
| #10 $x-1/2, -y+3/2, z$ | #11 $-x+1/2, y+1/2, z-1/2$ | #12 $-x+1/2, y-1/2, z+1/2$ |
| #13 $x-1/2, -y+1/2, z$ | #14 $-x+1, -y+2, z-1/2$    |                            |

**Table S3** The final atomic coordinates ( $\times 10^4$ ) and equivalent isotropic displacement parameters

( $\text{\AA}^2 \times 10^3$ ) for  $\text{Cs}_3\text{YGe}_3\text{O}_9$ .  $U_{\text{eq}}$  is defined as one-third of the trace of the orthogonalized  $U_{ij}$  tensor, and the bond valence sum for each atom in asymmetric unit.

|               | <b>x</b> | <b>y</b> | <b>z</b> | <b>U(eq)</b> | <b>BVS</b> |
|---------------|----------|----------|----------|--------------|------------|
| <b>Y(1)</b>   | 5381(1)  | 3462(1)  | 2259(1)  | 7(1)         | 3.107      |
| <b>Ge(1)</b>  | 4114(1)  | 3958(1)  | 4781(1)  | 9(1)         | 3.947      |
| <b>Ge(2)</b>  | 2244(1)  | -1076(1) | 7751(1)  | 10(1)        | 3.961      |
| <b>Ge(3)</b>  | 3953(1)  | 1544(1)  | 6882(1)  | 8(1)         | 4.063      |
| <b>Cs(1)</b>  | 6719(1)  | 5445(1)  | 4680(1)  | 32(1)        | 0.810      |
| <b>Cs(2)</b>  | 6774(1)  | 501(1)   | 6220(1)  | 34(1)        | 0.824      |
| <b>Cs(3)</b>  | 4370(3)  | 8944(7)  | 4025(5)  | 32(1)        | 0.970      |
| <b>Cs(3A)</b> | 4540(20) | 9010(20) | 4160(20) | 59(3)        | 1.076      |
| <b>O(1)</b>   | 5028(4)  | 3112(9)  | 3991(5)  | 14(1)        | -2.154     |
| <b>O(2)</b>   | 4414(5)  | 5866(10) | 5549(5)  | 22(2)        | -2.249     |
| <b>O(3)</b>   | 4709(4)  | -366(8)  | 6901(6)  | 15(1)        | -2.155     |
| <b>O(4)</b>   | 4401(5)  | 3440(9)  | 7573(5)  | 18(1)        | -2.092     |
| <b>O(5)</b>   | 3042(4)  | -2955(9) | 7716(6)  | 19(1)        | -1.836     |
| <b>O(6)</b>   | 2778(5)  | 1095(9)  | 7365(6)  | 26(2)        | -2.020     |
| <b>O(7)</b>   | 3047(5)  | 4551(11) | 4059(5)  | 24(2)        | -2.015     |
| <b>O(8)</b>   | 1224(4)  | 1451(10) | 6989(5)  | 20(1)        | -1.895     |
| <b>O(9)</b>   | 3652(4)  | 2062(9)  | 5558(5)  | 16(1)        | -2.340     |

**Table S4** The final atomic coordinates ( $\times 10^4$ ) and equivalent isotropic displacement parameters ( $\text{\AA}^2 \times 10^3$ ) for  $\text{Cs}_3\text{GdGe}_3\text{O}_9$ .  $U_{\text{eq}}$  is defined as one-third of the trace of the orthogonalized  $U_{ij}$  tensor, and the bond valence sum for each atom in asymmetric unit.

|               | <b>x</b> | <b>y</b>  | <b>z</b> | <b>U(eq)</b> | <b>BVS</b> |
|---------------|----------|-----------|----------|--------------|------------|
| <b>Gd(1)</b>  | 4615(1)  | 13471(2)  | 7453(1)  | 11(1)        | 3.150      |
| <b>Ge(1)</b>  | 3947(2)  | 8468(4)   | 7073(2)  | 14(1)        | 4.068      |
| <b>Ge(2)</b>  | 4101(2)  | 6054(4)   | 4978(2)  | 13(1)        | 3.947      |
| <b>Ge(3)</b>  | 2750(2)  | 6079(4)   | 2956(3)  | 16(1)        | 3.786      |
| <b>Cs(1)</b>  | 4378(6)  | 1066(5)   | 4259(4)  | 55(2)        | 0.895      |
| <b>Cs(1A)</b> | 4900(30) | 950(30)   | 4520(20) | 55(2)        | 1.025      |
| <b>Cs(2)</b>  | 1720(2)  | 10453(4)  | 4889(2)  | 43(1)        | 0.787      |
| <b>Cs(2A)</b> | 1591(15) | 8800(40)  | 5410(20) | 43(1)        | 1.272      |
| <b>Cs(3)</b>  | 1774(2)  | 5513(5)   | 6445(3)  | 55(1)        | 0.771      |
| <b>Cs(3A)</b> | 1580(20) | 5580(40)  | 7150(30) | 55(1)        | 1.187      |
| <b>O(1)</b>   | 4695(12) | 10350(30) | 7089(18) | 24(5)        | -1.980     |

|             |          |          |          |       |        |
|-------------|----------|----------|----------|-------|--------|
| <b>O(2)</b> | 4383(16) | 6570(30) | 7766(17) | 22(5) | -1.870 |
| <b>O(3)</b> | 3643(14) | 7870(30) | 5768(17) | 23(4) | -2.172 |
| <b>O(4)</b> | 4398(15) | 4140(30) | 5735(19) | 26(5) | -1.944 |
| <b>O(5)</b> | 3069(16) | 5410(30) | 4280(20) | 33(6) | -1.940 |
| <b>O(6)</b> | 3730(15) | 6400(30) | 2168(18) | 31(6) | -1.890 |
| <b>O(7)</b> | 2196(15) | 3900(30) | 2590(20) | 41(7) | -1.980 |
| <b>O(8)</b> | 1979(13) | 8000(30) | 2950(18) | 22(4) | -1.800 |
| <b>O(9)</b> | 5050(15) | 6900(30) | 4205(16) | 23(5) | -1.840 |

**Table S5** The infrared feature peak details of CYGO and CGGO.<sup>[1,2]</sup>

| <b>Compound</b>      | <b>Position of peak</b> | <b>Vibration mode</b>                      |
|----------------------|-------------------------|--------------------------------------------|
| <b>CYGO and CGGO</b> | 400 cm <sup>-1</sup>    | Symmetrical curvature vibration of Ge-O-Ge |
|                      | 532 cm <sup>-1</sup>    | Aymmetrical stretching vibrations of Ge-O  |
|                      | 731 cm <sup>-1</sup>    | Asymmetric stretching of Ge-O-Ge           |

#### References:

1. R. Saez-Puche, M. Bijkerk, F. Fernández, E. Baran and I. Botto, Crystallographic data, vibrational spectra and magnetic properties of the lanthanide digermanates Ln<sub>2</sub>Ge<sub>2</sub>O<sub>7</sub>, *J. Alloys Compd.*, 1992, **184**, 25-34.
2. I. I. Leonidov, V. P. Petrov, V. A. Chernyshev, A. E. Nikiforov, E. G. Vovkotrub, A. P. Tyutyunnik and V. G. Zubkov, Structural and vibrational properties of the ordered Y<sub>2</sub>CaGe<sub>4</sub>O<sub>12</sub> germanate: a periodic Ab initio study, *J. Phys. Chem. C*, 2014, **118**, 8090-8101.
